# Supplementary material for: The Transcription Factor Erg Controls Endothelial Cell Quiescence by Repressing Activity of Nuclear Factor (NF)-κB p65
Source: PubMed Central journal article supplement — J Biol Chem. 2012 Feb 15;287(15):12331–42. doi: 10.1074/jbc.M112.346791 (PMC3320982; doi:10.1074/jbc.m112.346791), 2012-02-15
Supplement: supp_M112.346791_jbc.M112.346791-1.pdf [file supp_M112.346791_jbc.M112.346791-1.pdf]

**Supplementary Table 1.** Oligonucleotide sequences used in this study

| <b>RT PCR oligonucleotides</b> |                                                                           |
|--------------------------------|---------------------------------------------------------------------------|
| Erg                            | Fwd 5'-GGAGTGGGCGGTGAAAGA-3'<br>Rev 5'-AAGGATGTCCGCCTTGTAGC-3'            |
| Fli-1                          | Fwd 5'-ACGGGACTATTAAGGAGGCTCTG-3'<br>Rev 5'-GTTGACCCTCACTGGCCTGATTG-3'    |
| Ets2                           | Fwd 5'-GAGTTTCAGATGTTCCCAAGTC-3'<br>Rev 5'-CTCCGCACCGTTCTCAGG-3'          |
| GABPα                          | Fwd 5'-AAGTGACAAGATGGGCTGCT-3'<br>Rev 5'-CTCCCCGAAATGTTGAGTGT-3'          |
| GAPDH                          | Fwd 5'-CAAGGTCATCCATGACAACCTTTG-3'<br>Rev 5'-GGGCCATCCACAGTCTTCTG-3'      |
| ICAM-1                         | Fwd 5'-CTGAAACTTGCTGCCTATTGGG-3'<br>Rev 5'-ACACATGTCTATGGAGGGCCA-3'       |
| cIAP2                          | Fwd 5'-TGCCAAGTGGTTTCCAAGGTGTGAG-3'<br>Rev 5'-GGGCTGTCTGATGTGGATAGCAGC-3' |
| <b>ChIP oligonucleotides</b>   |                                                                           |
| ICAM-1 region 1                | Fwd 5'-GGGAAATATGCGTCTCTGGA-3'<br>Rev 5'-CAGAAGGGGAAGCGAAGG-3'            |
| ICAM-1 region 2                | Fwd 5'-CTCAGTTTCCCAGGGACAG<br>Rev 5'-AGGAAGGAAGCTGCGTGAT-3'               |
| ICAM-1 region 3                | Fwd 5'-GACACAATAACAGTCTCCACTCTCC-3'<br>Rev 5'-GCTGCTCCCGGCCTCCAG-3'       |

|                                                   |                                                                           |
|---------------------------------------------------|---------------------------------------------------------------------------|
| ICAM-1 region 4                                   | Fwd 5'-TTGGAAATTCCGGAGCTGAA-3'<br>Rev 5'- TGCTGCAGTTATTTCCGGACT-3'        |
| ICAM-1 region 5                                   | Fwd 5'-GGCGCGTGATCCTTTATAGC-3'<br>Rev 5'-ATTTGTTCCGGAGGG-3'               |
| cIAP2                                             | Fwd 5'-GCCACGGTTAAGAGTCATGC-3'<br>Rev 5'-AAATCCCCACCCCTATCTGT-3'          |
| IL8                                               | Fwd 5'-GGAAGTGTGATGACTCAGGTTTGC-3'<br>Rev 5'-CACAGTGAGATGGTTCCTTCCGGTG-3' |
| GAPDH                                             | Fwd 5'-ATGGTTGCCACTGGGGATCT- 3'<br>Rev 5'-TGCCAAAGCCTAGGGGAAGA-3;         |
| <b>Site directed mutagenesis oligonucleotides</b> |                                                                           |
| EBS-96                                            | 5'-GGAAATAACTGCAGCATTGTTGGGGAGGG<br>GAAGGC-3'                             |
| EBS-118                                           | 5'-GGGGCACCCCTGTCAGTCCCCAAATAACTGC<br>AGCATT-3'                           |
| EBS-156                                           | 5'-GGCCAGCGAGGGACCATGACCCTCTCGG-3'                                        |
| EBS-181                                           | 5'-CCGATTGCTTTAGCTTGGAATTGGGGAGC<br>TGAAGCG-3'                            |
| NF-κB                                             | 5'-CCACCGCCGCCGATTGCTTTAGCTTCTAG<br>ATTAGGGAGCTGAAGCGGC-3'                |
| EBS-358                                           | 5'-AACAGTGTCCACTCTCCGGCCAAGTTGGCAG<br>TATTTAAAA-3'                        |
| EBS-834                                           | 5'-GCTAGCTGCCTCAGTTTGGCCGCGGAGC-3'                                        |

|                              |                                                                     |
|------------------------------|---------------------------------------------------------------------|
| EBS-907                      | 5'-GCTGCTGCCTCAGTTTGGCAGCGACAGGCA-3'                                |
| <b>EMSA oligonucleotides</b> |                                                                     |
| 118 WT                       | 5'-biotin-ATGACCCTCTCGGCCCGGGCACCCCTGTCAG<br>TCCGGAATAACTGCAGCAT-3' |
| 118 MUT                      | 5'-ATGACCCTCTCGGCCCGGGCACCCCTGTCAGTCCCCA<br>AATAACTGCAGCAT-3'       |
| 181 WT                       | 5'-biotin-GATTGCTTTAGCTTGGAAATTCCGGAGCTGAAG<br>CGGCC-3'             |
| 181 MUT                      | 5'-GATTGCTTTAGCTTGGAAATTGGGGAGCTGAAGCGG<br>CC-3'                    |
