# Supplementary material for: The Transcription Factor Erg Controls Endothelial Cell Quiescence by Repressing Activity of Nuclear Factor (NF)-κB p65
Source: PubMed Central journal article supplement — J Biol Chem. 2012 Feb 15;287(15):12331–42. doi: 10.1074/jbc.M112.346791 (PMC3320982; doi:10.1074/jbc.m112.346791), 2012-02-15
Supplement: supp_M112.346791_jbc.M112.346791-2.pdf [file supp_M112.346791_jbc.M112.346791-2.pdf]

## Supplementary Figure 1

### Basal expression of ETS factors in HUVEC

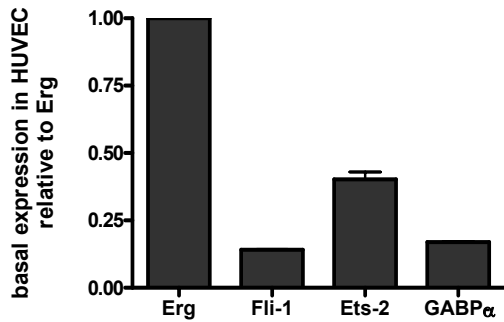

### Supplementary Figure 1 Legend

**Constitutive expression of ETS factors in EC.** mRNA from resting HUVEC was analysed by quantitative RTPCR using primers specific for Erg, Fli-1, Ets-2 or GABP $\alpha$ . Values were normalised to GAPDH mRNA, and expressed as relative to Erg (N=3).

## Supplementary Figure 2

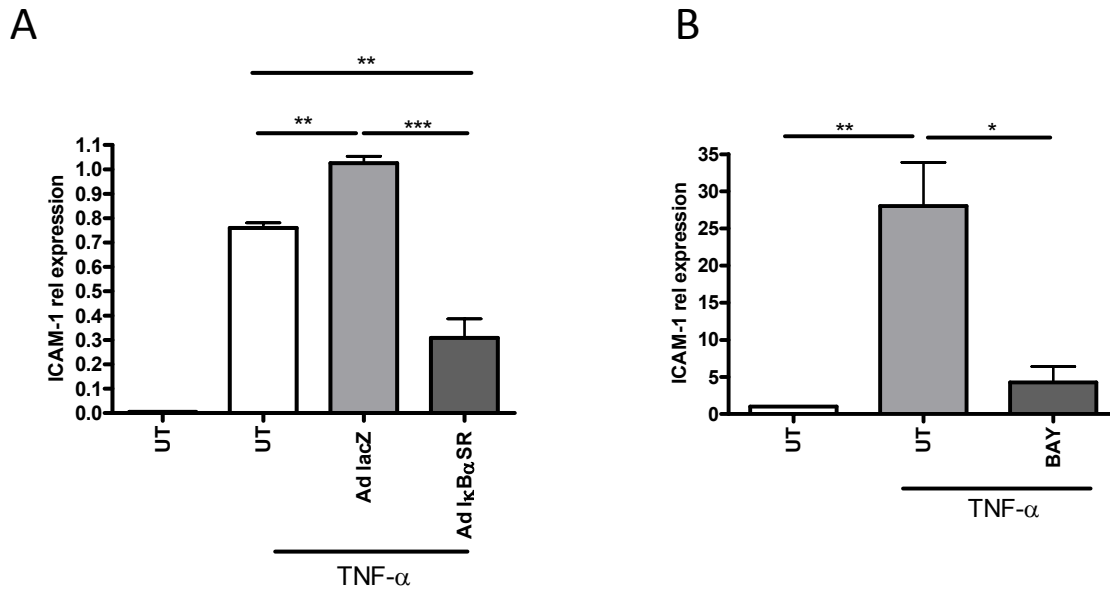

### Supplementary Figure 2 Legend

**NF-κB inhibitors repress TNF-α induced ICAM-1 expression.** A) HUVEC infected with either AdLacZ control or AdIκBαSR virus were stimulated with TNF-α. ICAM-1 mRNA levels were measured by quantitative RTPCR, and expressed as fold change compared to Ad LacZ treated. N=4. (B) HUVEC treated with BAY-11-7085 or DMSO were stimulated with TNF-α. ICAM-1 protein levels were measured by western blot using an anti ICAM-1 antibody and normalised to levels of GAPDH then expressed as fold change compared to untreated. N=3. \*P<0.05; \*\*P<0.01, \*\*\*P<0.001

### Supplementary Figure 3

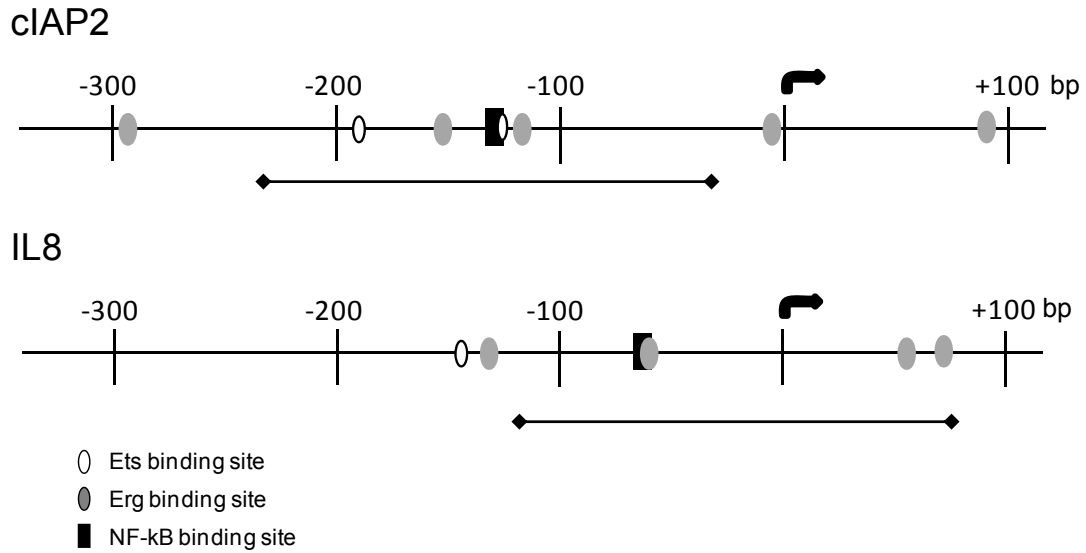

#### Supplementary Figure 3 Legend

**Schematic diagram of cIAP2 and IL8 promoters.** The transcription start site is marked by an arrow, with base pair numbers as indicated. ETS sites are indicated by oval shapes and ETS sites matching Erg consensus motif (28)(29) are shaded in grey. Functional NF-κB sites are represented by black boxes. CHIP amplicons are represented by a black line below corresponding promoter
